# Supplementary material
Source: PubMed Central journal article supplement (PMC137752)
Supplement: pnas_242566899_6.pdf [file pnas_242566899_6.pdf]

**Table 4. Estimated power and false positive rate per gene for several different sizes of samples (e.g.  $N = 4$  means a simulated experiment containing two control and two experimental samples)**

|                      | Sample size | <i>t</i> test      |                    | SAM                |                    | <i>t</i> test, BY corrected |                    | SAM, BY corrected  |                    | method fold change |
|----------------------|-------------|--------------------|--------------------|--------------------|--------------------|-----------------------------|--------------------|--------------------|--------------------|--------------------|
|                      |             | 1.5                | 2                  | 1.5                | 2                  | 1.5                         | 2                  | 1.5                | 2                  |                    |
| power: mean (sd)     | N = 4       | 0.68<br>(0.09)     | 0.82<br>(0.06)     | 0.85 (0.07)        | 0.98<br>(0.03)     | 0.11<br>(0.03)              | 0.11<br>(0.03)     | 0.34<br>(0.16)     | 0.88<br>(0.09)     |                    |
| false pos: mean (sd) |             | 6.6e-4<br>(8.3e-5) | 2.2e-5<br>(9.8e-6) | 4.9e-3<br>(5.6e-4) | 3.7e-4<br>(1.8e-4) | 3.7e-4<br>(1.3e-4)          | 1.2e-5<br>(7.3e-6) | 7.1e-4<br>(4.7e-4) | 1.9e-4<br>(6.1e-5) |                    |
| power: mean (sd)     | N = 8       | 0.94<br>(0.04)     | 0.98<br>(0.02)     | 0.98 (0.02)        | 1 (0)              | 0.23<br>(0.1)               | 0.5 (0.1)          | 0.77<br>(0.13)     | 0.96<br>(0.05)     |                    |
| false pos: mean (sd) |             | 4.1e-4<br>(2.2e-4) | 2.4e-5<br>(1.7e-5) | 1.6e-3<br>(4.9e-4) | 1.1e-4<br>(5.4e-5) | 4.4e-5<br>(5.1e-5)          | 4.9e-6<br>(9.8e-6) | 7.1e-4<br>(2.1e-4) | 5.4e-5<br>(2.9e-5) |                    |
| power: mean (sd)     | N = 12      | 0.97<br>(0.02)     | 1 (0.01)           | 0.98 (0.01)        | 0.99<br>(0.01)     | 0.51<br>(0.07)              | 0.81<br>(0.08)     | 0.86<br>(0.06)     | 0.97<br>(0.04)     |                    |
| false pos: mean (sd) |             | 2.5e-4<br>(8.1e-5) | 1.2e-5<br>(9.8e-5) | 7.1e-4<br>(2.0e-4) | 3.7e-4<br>(2.7e-5) | 1.7e-5<br>(2.4e-5)          | 2.4e-6<br>(2.4e-6) | 3.6e-4<br>(1.5e-4) | 3.4e-5<br>(9.8e-6) |                    |

The methods used are the same as those for Table 3.
