# Supplementary material
Source: PubMed Central journal article supplement (PMC137752)

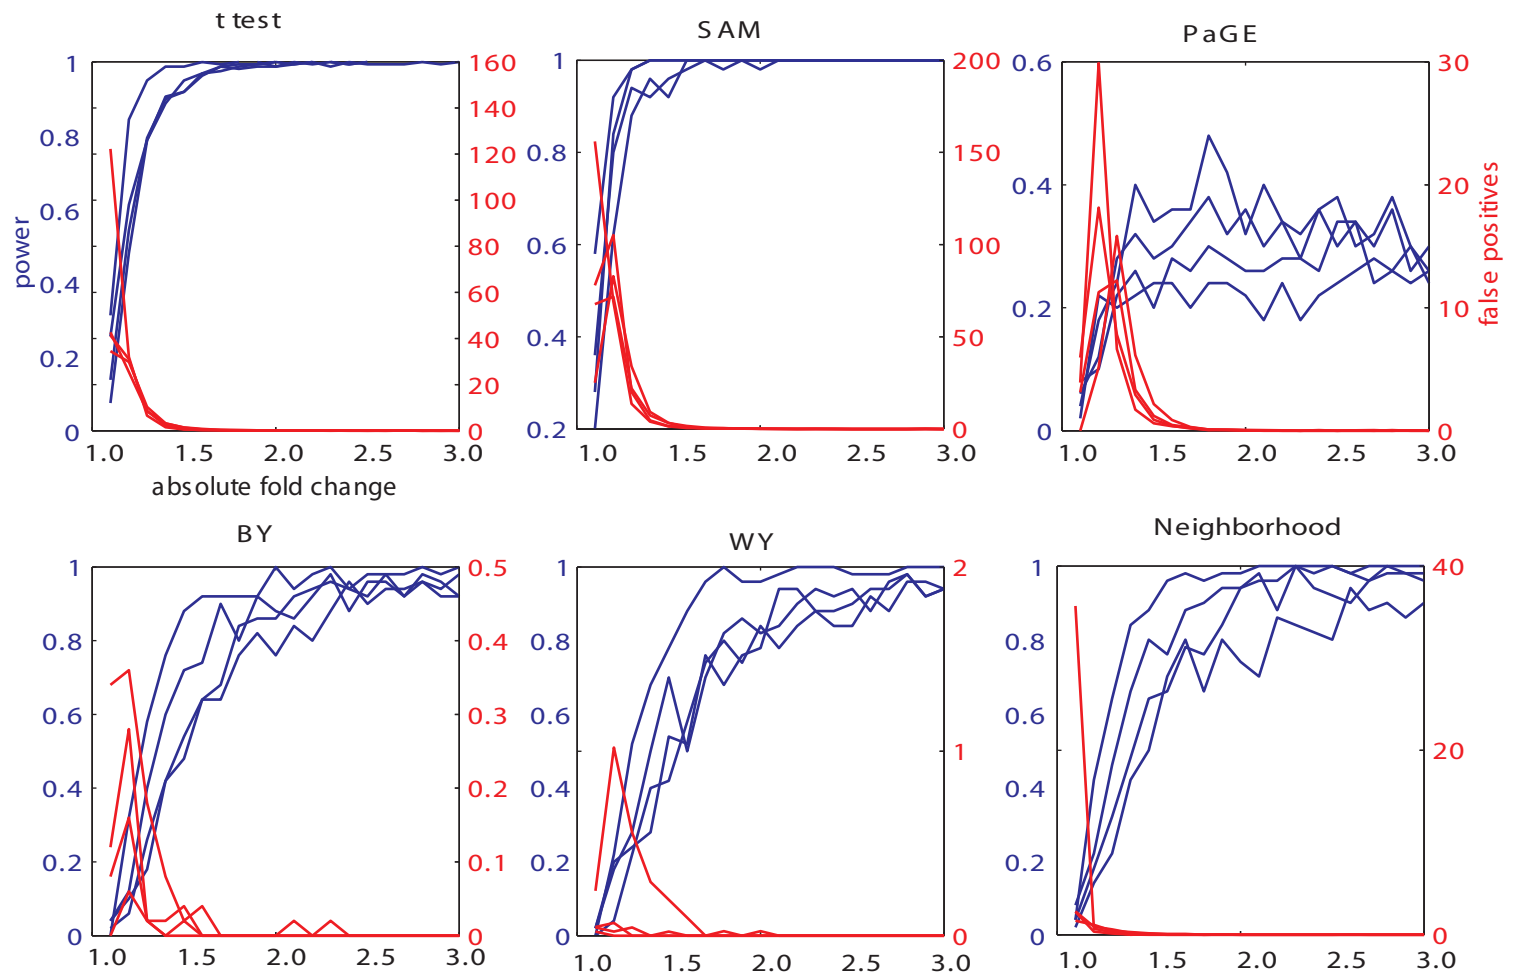

Supplement: pnas_242566899_2.pdf [file pnas_242566899_2.pdf]
